# Supplementary material for: Heparan Sulfate: A Regulator of White Adipocyte Differentiation and of Vascular/Adipocyte Interactions
Source: MDPI journal article supplement (doi:10.3390/biomedicines10092115), 2022-08-29
Supplement: s1 [file s1]

## Supplementary Materials:

**Table S1.** Examples of Adipokines that possess HB-domain.

| <b>Fibroblast growth factor-1</b> | <b>Fibroblast growth factor-2</b>        | <b>Vascular endothelial growth factor A<sub>165</sub></b> | <b>Vascular endothelial growth factor A<sub>189</sub></b> |
|-----------------------------------|------------------------------------------|-----------------------------------------------------------|-----------------------------------------------------------|
| Placental growth factor           | Heparan binding epithelial growth factor | Hepatocyte growth factor                                  | Transforming growth factor- $\beta$                       |
| Interferon $\gamma$               | Platelet derived growth factor-BB        | Platelet derived growth factor AA                         | Pleotrophin                                               |
| Platelet factor 4                 | Interleukin 8                            | Macrophage inflammatory protein 1                         | Interleukin 10                                            |
